# Supplementary material for: Anp32a Promotes Neuronal Regeneration after Spinal Cord Injury of Zebrafish Embryos
Source: MDPI journal article supplement (doi:10.3390/ijms232415921), 2022-12-14
Supplement: s1 [file s1]

Table S1. Morphological phenotypes and swimming capacity of SCI-embryos injected with different materials as indicated.

| Materials                                                                                                    | Amount        | No. of survival embryos<br>among injected eggs | No. of wild-type<br>like phenotype | Average of swimming<br>distance (cm) |
|--------------------------------------------------------------------------------------------------------------|---------------|------------------------------------------------|------------------------------------|--------------------------------------|
| Uninjured embryo                                                                                             | N/A           | 36/36                                          | 36/36                              | 5.76681                              |
| non-injection                                                                                                | N/A           | 48/53                                          | 47/48                              | 3.59689                              |
| <i>anp32a</i> -MO                                                                                            | 1 ng          | 48/63                                          | 46/48                              | 3.57431                              |
| <i>anp32a</i> -MO                                                                                            | 1.5 ng        | 45/62                                          | 40/45                              | 3.43722                              |
| <i>anp32a</i> -MO                                                                                            | 2 ng          | 74/102                                         | 63/74                              | 1.85472                              |
| <i>anp32a</i> -MO                                                                                            | 4 ng          | 11/47                                          | 3/11                               | 0                                    |
| non-injection                                                                                                | N/A           | 42/44                                          | 42/42                              | 3.63248                              |
| <i>anp32a</i> RNA                                                                                            | 200 pg        | 54/64                                          | 39/54                              | 5.72380                              |
| <i>anp32a</i> RNA                                                                                            | 400 pg        | 43/82                                          | 11/43                              | 3.58293                              |
| <i>Wobble anp32a flag</i> RNA                                                                                | 200 pg        | 38/51                                          | 29/38                              | 5.43829                              |
| <i>Wobble anp32a flag</i> RNA                                                                                | 400 pg        | 33/84                                          | 9/33                               | 3.11833                              |
| <i>anp32a</i> -MO+ <i>Wobble anp32a flag</i> RNA                                                             | 2 ng + 200 pg | 45/67                                          | 38/45                              | 4.67383                              |
| All embryos except uninjured embryo group were SCI at 48 hpf and performed swimming capacity assay at 24 hpi |               |                                                |                                    |                                      |
